1               Broad antifungal resistance mediated by RNAi-dependent  
2               epimutation in the basal human fungal pathogen *Mucor*  
3               *circinelloides*

4  
5 Zanetta Chang<sup>1</sup>, R. Blake Billmyre<sup>2</sup>, Soo Chan Lee<sup>3</sup>, and Joseph Heitman<sup>1,\*</sup>  
6

7 <sup>1</sup>Department of Molecular Genetics and Microbiology, Duke University, Duke University  
8 Medical Center, Durham, North Carolina, United States of America

9 <sup>2</sup>Stowers Institute for Medical Research, Kansas City, Missouri, United States of  
10 America

11 <sup>3</sup>South Texas Center for Emerging Infectious Diseases (STCEID), Department of  
12 Biology, University of Texas, San Antonio, San Antonio, Texas, United States of  
13 America

14  
15  
16  
17  
18  
19  
20  
21 \*Corresponding author:

22 Email: [heitm001@duke.edu](mailto:heitm001@duke.edu) (JH)  
23  
24

## 25 **Abstract**

26

27           Mucormycosis - an emergent, deadly fungal infection - is difficult to treat, in part  
28 because the causative species demonstrate broad clinical antifungal resistance.  
29 However, the mechanisms underlying drug resistance in these infections remain poorly  
30 understood. Our previous work demonstrated that one major agent of mucormycosis,  
31 *Mucor circinelloides*, can develop resistance to the antifungal agents FK506 and  
32 rapamycin through a novel, transient RNA interference-dependent mechanism known  
33 as epimutation. Epimutations silence the drug target gene and are selected by drug  
34 exposure; the target gene is re-expressed and sensitivity is restored following passage  
35 without drug. This silencing process involves generation of small RNA (sRNA) against  
36 the target gene via core RNAi pathway proteins. To further elucidate the role of  
37 epimutation in the broad antifungal resistance of *Mucor*, epimutants were isolated that  
38 confer resistance to another antifungal agent, 5-fluoroorotic acid (5-FOA). We identified  
39 epimutant strains that exhibit resistance to 5-FOA without mutations in *PyrF* or *PyrG*,  
40 enzymes which convert 5-FOA into the active toxic form. Using sRNA hybridization as  
41 well as sRNA library analysis, we demonstrate that these epimutants harbor sRNA  
42 against either *pyrF* or *pyrG*, and further show that this sRNA is lost after reversion to  
43 drug sensitivity. We conclude that epimutation is a mechanism capable of targeting  
44 multiple genes, enabling *Mucor* to develop resistance to a variety of antifungal agents.  
45 Elucidation of the role of RNAi in epimutation affords a fuller understanding of  
46 mucormycosis. Furthermore, it improves our understanding of fungal pathogenesis and  
47 adaptation to stresses, including the evolution of drug resistance.

## 48 **Author Summary**

49  
50           The emerging infection mucormycosis causes high mortality in part because the  
51 major causative fungi, including *Mucor circinelloides*, are resistant to most clinically  
52 available antifungal drugs. We previously discovered an RNA interference-based  
53 resistance mechanism, epimutation, through which *M. circinelloides* develops transient  
54 resistance to the antifungal agent FK506 by altering endogenous RNA expression. We  
55 further characterize this novel mechanism by isolating epimutations in two genes that  
56 confer resistance to another antifungal agent, 5-fluoroorotic acid. Thus, we demonstrate  
57 epimutation can induce resistance to multiple antifungals by targeting a variety of genes.  
58 These results reveal epimutation plays a broad role enabling rapid and reversible fungal  
59 responses to environmental stresses, including drug exposure, and controlling antifungal  
60 drug resistance and RNA expression. As resistance to antifungals emerges, a deeper  
61 understanding of the causative mechanisms is crucial for improving treatment.

## 62 Introduction

63

64 Mucormycosis, an emerging fungal infection, is notable for very high mortality,  
65 ranging from 50% for rhino-orbital-cerebral infections to 90% in disseminated infections  
66 [1]. Mucormycosis primarily affects immunocompromised patients: most commonly  
67 patients with diabetes, followed by those with hematologic cancers, prior organ  
68 transplants, trauma, and iron overload disorders [2, 3]. The increasing prevalence of  
69 these immunosuppressive disorders may explain the rising incidence of mucormycosis.  
70 Another major problem is that treatment options are very limited, with first-line therapy  
71 consisting of surgical debridement combined with amphotericin B or isavuconazole, the  
72 only FDA-approved antifungal agents for mucormycosis [4-6]. Even after recovery  
73 patients often suffer from permanent disfigurement.

74

75 The etiologic causes of mucormycosis are the Mucoralean fungi, of which the three  
76 most common infectious genera are *Rhizopus*, *Mucor*, and *Lichtheimia* [7]. Of these  
77 genera, *Mucor* has served as a model organism in various aspects of fungal biology (e.g.  
78 RNAi biology, virulence, and light sensing), and the scientific community has developed  
79 a set of tools for genetic manipulation [8-12]. Despite this knowledge base, many gaps  
80 remain in our understanding of the pathogenesis of *Mucor* as well as the biology of all  
81 Mucoralean species. For example, the broad, intrinsic antifungal resistance common to  
82 Mucoralean fungi results in limited treatment options and may contribute to the high  
83 mortality associated with mucormycosis, yet the mechanisms underlying this resistance  
84 remain largely uncharacterized. Our laboratory previously identified a form of drug

85 resistance in *Mucor* that is dependent upon endogenous RNA interference (RNAi),  
86 referred to as epimutation [13, 14].

87  
88 RNAi is a mechanism that targets specific mRNA transcripts and inactivates them  
89 through either mRNA degradation or inhibition of translation. The first description of RNAi  
90 in fungi was quelling, a mechanism for silencing repetitive sequences and transposons in  
91 the model fungus *Neurospora crassa* [15]. Later, RNAi was fully characterized in the  
92 nematode *Caenorhabditis elegans* [16], and has since been shown to be conserved  
93 throughout many eukaryotic lineages including a variety of fungi [17]. Many other forms  
94 of RNAi have since been characterized in fungi, including meiotic silencing by unpaired  
95 DNA in *Neurospora*, sex-induced silencing in *Cryptococcus neoformans*, and  
96 heterochromatin formation in *Schizosaccharomyces pombe* [18-21]. RNA-based control  
97 of fungal drug sensitivity was previously described in *S. pombe*, where a long non-coding  
98 RNA has been shown to epigenetically repress transcription of a permease and,  
99 therefore, decrease global drug sensitivity [22]. However, no RNAi-mediated form of drug  
100 resistance was described prior to our previous finding of epimutation in *Mucor* [13, 14]. In  
101 the Mucoralean fungi, RNAi machinery is conserved and functions to trigger silencing in  
102 *Mucor circinelloides* and *Rhizopus delemar/Rhizopus oryzae* [8, 23, 24]. Thus, *Mucor*  
103 serves as a model fungus for the study of RNAi and epimutation.

104  
105 The novel mechanism of epimutation involves the intrinsic RNAi silencing pathway,  
106 which transiently suppresses expression of fungal drug target genes. Epimutants in  
107 *Mucor* were previously identified that confer resistance to the antifungal agents FK506

108 and rapamycin. These epimutants harbor antisense small RNAs (sRNA) specific to the  
109 *fkbA* gene that trigger mRNA degradation and thereby prevent production of the drug  
110 target FKBP12 [13]. Epimutation is transient; after passage without FK506 drug selection,  
111 mRNA expression recovered gradually until *fkbA* mRNA returned to wild-type expression  
112 levels and, conversely, expression of the *fkbA*-specific sRNA was lost. Epimutation in  
113 *Mucor* requires multiple canonical RNAi proteins, including Dicer (Dcl1 and Dcl2),  
114 Argonaute (Ago1), and RNA-dependent RNA polymerase (RdRP2). Deletion of genes  
115 encoding these RNAi components in *M. circinelloides* led to an inability to form  
116 epimutants, showing that epimutation is dependent upon the RNAi pathway. Interestingly,  
117 deletion of two other RNA-dependent RNA polymerases, RdRP1 or RdRP3, or the RNAi  
118 pathway component R3B2, led to a significantly higher rate of epimutation, suggesting  
119 these components play an inhibitory role [14]. Taken together, these findings reveal the  
120 intrinsic RNAi pathway in *Mucor* can suppress drug target expression in a reversible  
121 fashion.

122

123 We report here the identification of epimutants resistant to an additional antifungal,  
124 the laboratory agent 5-fluoroorotic acid (5-FOA). 5-FOA is converted into a toxin by action  
125 of orotate phosphoribosyltransferase (PyrF) and orotidine-5'-monophosphate  
126 decarboxylase (PyrG), two enzymes in the uracil biosynthetic pathway. Antifungal  
127 resistance is evoked by selective generation of sRNA against either *pyrF* and *pyrG*.  
128 Similar to previous observations with FK506-resistant epimutants, sRNA generation in 5-  
129 FOA-resistant epimutants is transient and lost after passage in the absence of drug  
130 selection, or when the epimutants are grown in conditions lacking uracil. These

131 observations build on our prior findings to establish that epimutation is a general  
132 phenomenon that can affect multiple genetic loci in *Mucor* and induce resistance to  
133 multiple antifungal agents. The transient nature of epimutation allows for rapid adaptation  
134 through generation of phenotypic diversity in response to a variety of stresses, such as  
135 drug stress or auxotrophy. These findings advance our understanding of the genetic and  
136 molecular basis for antimicrobial drug resistance with implications for other pathogenic  
137 microbes with active RNAi pathways.

## 138 Results

139

### 140 Epimutation induces transient resistance to 5-FOA

141 Our previous work identified epimutation as a novel mechanism of antifungal  
142 resistance, but we had only studied sRNAs generated against a single locus, *fkbA* [13].  
143 To determine the broader scope epimutation might play in *Mucor* drug resistance, we  
144 generated epimutations against another antifungal compound. The well-characterized  
145 laboratory antifungal agent 5-fluoroorotic acid (5-FOA) possesses efficacy against *Mucor*  
146 and is used as a tool for genetic manipulation [12, 25-27]. The genes responsible for 5-  
147 FOA toxicity in *Mucor* encode orotate phosphoribosyltransferase (*pyrF*) and orotidine-5'-  
148 monophosphate decarboxylase (*pyrG*) [28, 29]. PyrF and PyrG are responsible for the  
149 conversion of 5-FOA, a prodrug, into 5-fluorouracil, which serves as a toxic nucleotide  
150 analog. Therefore, a loss-of-function mutation in either of these two genes confers  
151 resistance. Because these genes also play roles in the pyrimidine synthesis pathway,  
152 *pyrF* or *pyrG* mutation also causes uracil auxotrophy. The clear understanding of the  
153 mechanisms and targets of 5-FOA simplified the process of screening for epimutants.

154

155 To increase the possibility of isolating epimutants we performed initial screens in  
156 two RNAi-deficient backgrounds, *rdp1* $\Delta$  and *rdp3* $\Delta$ , which demonstrated an enhanced  
157 rate of epimutation in previous studies of FK506-resistant epimutation [14].  
158 These *rdp1* $\Delta$  and *rdp3* $\Delta$  mutant strains contain two copies of *pyrG*. The  
159 original *pyrG* locus contains a known point mutation, G413A, which confers 5-FOA  
160 resistance. Due to the limited selectable markers available for *Mucor*, a functional copy  
161 of *pyrG* was subsequently inserted into either the *rdp1* or *rdp3* locus to generate the



162 RNAi mutant strains. Therefore, to sequence and identify *pyrG* mutations in RNAi mutant  
163 strains, we specifically amplified the copy of *pyrG* inserted in either *rdrp1* or *rdrp3* using  
164 the appropriate locus-specific primers (S1 Table). Of note, all of the *pyrG* mutations found  
165 in this study match the original mutation seen in the endogenous mutant *pyrG* locus (S2  
166 Table). This is most likely due to gene conversion from the endogenous locus, indicating  
167 a higher rate of gene conversion when compared to *de novo* mutation. This phenomenon  
168 may have contributed to the relatively low frequency of isolation of *pyrG* epimutants.

169  
170 To derive 5-FOA-resistant isolates, *rdrp1* $\Delta$  and *rdrp3* $\Delta$  strains were grown in the  
171 presence of 5-FOA in media supplemented with uridine and uracil. Under these conditions  
172 the strains, initially sensitive, grew as abnormal, stunted hyphae; but after approximately  
173 two weeks of incubation patches of resistant filamentous growth were isolated and  
174 analyzed. Two *pyrF* epimutants (designated as strains E1 and E2) were isolated from an  
175 *rdrp3* mutant strain. In addition, four *pyrF* epimutants (including strains E3 and E5) and  
176 one *pyrG* epimutant (E4) were isolated in an *rdrp1* mutant strain, a second strain with  
177 enhanced rates of epimutation [13]. Based on sRNA hybridization analysis,  
178 representative epimutants express antisense sRNA against either the *pyrF* or *pyrG* locus,  
179 but not both (Fig. 1a, b). No 5-FOA-resistant epimutant strains were identified in wild-type  
180 strains R7B (*M. circinelloides* f. *lusitanicus*) or 1006PhL (*M. circinelloides* f. *circinelloides*),  
181 or in an *r3b2* $\Delta$  strain, mutated for a different RNAi component (S2 Table). Interestingly,  
182 rates of 5-FOA-resistant epimutation in all strains tested were decreased compared to the  
183 rates seen in the initial report of FK506-resistant epimutants (Table 1).

184

185 **Table 1. Rates of *pyrF* and *pyrG* epimutation by background strain**

|               |                    | <b>Total</b> | <b>Epimutant</b> | <b>Mutant</b> | <b>Unknown</b> |
|---------------|--------------------|--------------|------------------|---------------|----------------|
| <i>rdrp3Δ</i> | Number of isolates | 14           | 2                | 0             | 12             |
|               | Percentage         |              | 14.3%            | 0%            | 85.7%          |
| <i>rdrp1Δ</i> | Number of isolates | 27           | 5                | 20            | 2              |
|               | Percentage         |              | 18.5%            | 74.1%         | 7.4%           |
| <i>r3b2Δ</i>  | Number of isolates | 14           | 0                | 12            | 2              |
|               | Percentage         |              | 0%               | 85.7%         | 14.3%          |
| R7B           | Number of isolates | 2            | 0                | 0             | 2              |
|               | Percentage         |              | 0%               | 0%            | 100.0%         |
| 1006PhL       | Number of isolates | 61           | 0                | 28            | 33             |
|               | Percentage         |              | 0%               | 45.9%         | 54.1%          |

186

187 All epimutant strains were stably 5-FOA-resistant when maintained under drug selection

188 conditions. However, following passage on media lacking 5-FOA, all five strains reverted

189 to a 5-FOA sensitive phenotype. To determine 5-FOA sensitivity, epimutant and

190 passaged strains were plated on MMC media without uracil, MMC with uracil

191 supplementation, and MMC with 5-FOA and uracil for phenotypic analysis (Fig. 1c, d).

192 Uracil auxotrophic strains with known mutations, such as the *pyrG*- mutant strain, are

193 unable to grow robustly on MMC alone. In contrast, the epimutant strains were able to

194 grow to some extent on MMC. Epimutant E2 shows qualitatively reduced growth on agar

195 plates relative to the parental strain, while epimutant E4 shows growth indistinguishable

196 from the parental strain. This suggests that epimutants placed in auxotrophic conditions

197 may still be able to synthesize uracil at a low level; or, alternatively, that the epimutation

198 has begun to revert toward wild-type when epimutant spores are incubated on MMC.

199 Complete reversion of epimutant strains - loss of 5-FOA resistance and wild-type rates of

200 growth on MMC - was observed for *pyrF* epimutants E1, E3, and E5, as well as *pyrG*

201 epimutant E4 after five passages (Fig. 1d). The *pyrF* epimutant E2 demonstrated only

202 partial reversion to drug sensitivity after five passages but complete reversion after ten  
203 (Fig. 1c). sRNA was isolated from these reverted strains after five or ten passages and  
204 sRNA hybridization was performed. Strains E1, E3, E4, and E5 demonstrated a complete  
205 loss of *pyrF* or *pyrG* sRNA after five passages, corresponding with their phenotypic  
206 reversion; likewise, strain E2 demonstrated a reduction of *pyrF* sRNA after five passages  
207 and complete loss after ten passages (Fig. 1a, b).

208

### 209 **5-FOA-resistant epimutants express sRNA specific to the *pyrF* or *pyrG* locus**

210 sRNA libraries were generated from *pyrF* epimutants (E1, E2) and the *pyrG*  
211 epimutant (E4) as well as their corresponding revertants, and these libraries were  
212 sequenced via Illumina. Epimutation induced a significant increase in both sense and  
213 antisense sRNAs against *pyrF* or *pyrG* in their respective epimutants. For *pyrF*, which  
214 contains no introns, these sRNAs were distributed across the ORF (Fig. 2a). sRNAs  
215 expressed against *pyrG* were localized specifically to the exons (Fig. 2b). In both cases,  
216 these sRNAs are homologous to the target loci and not to either upstream or downstream  
217 regions. Genome-wide, *pyrF* and *pyrG* were among the genes most strongly differentially  
218 enriched for sRNAs in the epimutant versus the revertant strains, even without complete  
219 reversion to wild-type levels in the revertants (S1 Fig). Expression of the *pyrF* or *pyrG*  
220 specific sRNAs was lost upon reversion to 5-FOA sensitivity, although the E1 revertant  
221 did not return completely to parental levels after five passages.

222

### 223 ***pyrF* and *pyrG* epimutants harbor sRNAs with characteristic features**

224 sRNAs from 5-FOA-resistant *pyrF* or *pyrG* epimutants also shared characteristics  
225 typical of sRNAs involved in the canonical RNAi pathway. These features included a high

226 prevalence of a 5' terminal uracil, which was found in antisense sRNAs in particular (Fig.  
227 3a, 3b). Representative analysis from the *pyrF* epimutant E1 is shown here (Fig. 3a), as  
228 well as from the *pyrG* epimutant E4 (Fig. 3b). The same 5' uracil predominance was  
229 observed in the few antisense sRNA reads found in the revertants; for better visualization  
230 a version of this figure with a scaled Y-axis has also been included (S2 Fig). This 5' uracil  
231 prevalence was not identified in sense sRNAs from the same regions. In addition, the  
232 lengths of sRNA molecules homologous to these loci were predominantly between 21  
233 and 24 nucleotides (Fig. 3c, 3d), a second feature of sRNAs generated by the canonical  
234 RNAi pathway and which interact with the RNAi effector protein Argonaute.

235

### 236 **A subset of genes with similarity to transposons exhibits altered sRNA levels**

237 Analysis of genome-wide sRNA content also revealed a subset of genes that  
238 behaved unexpectedly in different samples. This set of genes had reduced sRNA content  
239 in the E2 epimutant, an *rdrp3Δ* mutant, compared to the rest of the *rdrp3Δ* strains that  
240 were sequenced (S3 Fig). Interestingly, while sRNA levels of these genes in the wild-type  
241 parent of the *rdrp1Δ* mutant were similar to levels in the *rdrp3Δ* mutant and its wild-type  
242 parent, all three sequences of *rdrp1Δ* strains in this study had lower sRNA levels  
243 corresponding to the same set of genes that behaved unusually in the E2 revertant (S3  
244 Fig). A cutoff of 15-fold enrichment in the E4 revertant over the E4 epimutant was  
245 established, which selected 516 genes. Analysis of this gene set was complicated by  
246 generally low quality functional annotation of the *Mucor* genome. These genes were not  
247 grouped in any genomic location region but were relatively evenly distributed, appearing  
248 on every scaffold of the genome over 41 kb in size (S3 Fig). A search for conserved

249 domains in this gene set revealed only 152 genes that encoded identifiable functional  
250 domains. However, 91 of these genes had predicted functions consistent with  
251 transposons or retrotransposons, including reverse transcriptase or transposase  
252 domains. These results may suggest that RdRP1 plays a role in repressing transposable  
253 elements via sRNA. However, the aberrant behavior of the E2 epimutant is not explained  
254 by this hypothesis because both the epimutant and its revertant are in the *rdrp3Δ*  
255 background. This suggests another level of regulation of this unusual class of sRNA.

256

### 257 **Epimutants exhibit reduced expression of target genes**

258         Analysis of *pyrF* and *pyrG* mRNA expression levels by quantitative real-time PCR  
259 (qRT-PCR) showed a decrease in expression levels in epimutant isolates corresponding  
260 with sRNA generation. In *pyrF* epimutant strains, expression of *pyrF* mRNA was  
261 significantly decreased relative to expression in the *rdrp3* mutant parental background.  
262 Moreover, *pyrF* expression levels were restored upon reversion of the *pyrF* epimutation  
263 after five or ten passages (Fig. 4 a). As expected, no significant decrease was observed  
264 in *pyrG* expression in these *pyrF* epimutants either before or after reversion (Fig. 4b).  
265 Correspondingly, in the *pyrG* epimutant strain, decreased expression of *pyrG* but not *pyrF*  
266 mRNA was observed, with a subsequent increase upon reversion to 5-FOA sensitivity  
267 (Fig. 4 c, d).

268

## 269 Discussion

270  
271 Epigenetic alteration of gene expression can lead to marked changes in phenotype  
272 across a variety of organisms. The phenomenon of epimutation was first described in  
273 plants and later in cancer biology; these particular alterations are attributable to extensive  
274 DNA methylation leading to gene silencing. Epimutations in snapdragons produce a  
275 phenotype wherein normal floral bilateral asymmetry is converted to radial symmetry [30].  
276 In the field of cancer research, there is growing awareness that carcinogenesis can be  
277 driven by epimutation rather than mutations, including but not limited to cancers such as  
278 hereditary nonpolyposis colorectal cancer or BRCA-associated breast cancer [31-35].  
279 Another role of epimutation that has gained attention is as a mechanism of drug  
280 resistance, with a particular focus on the roles played by DNA methylation and long  
281 noncoding RNAs in tumor drug resistance [36, 37]. Finally, a third form of epigenetic drug  
282 resistance, RNAi-dependent epimutation, was discovered to be a novel and transient  
283 mechanism of resistance to the agent FK506 in pathogenic fungi [13].

284  
285 Identification of 5-FOA-resistant *Mucor* epimutants confirms that this mechanism  
286 is broader than had been previously demonstrated. Epimutation is capable of conferring  
287 resistance to multiple antifungal agents with different mechanisms of action, by targeting  
288 multiple genes. 5-FOA-resistant epimutant strains were identified that demonstrated  
289 silencing of either the *pyrF* locus or the *pyrG* locus. Therefore, generalization of the  
290 mechanism suggests that epimutation may broadly contribute to resistance by silencing  
291 a variety of drug target genes. No specific triggers for RNAi-based epimutation have been  
292 identified to date, although various stress conditions were previously tested [13]. The

293 previous locus of epimutation, *fkbA*, was noted to have an overlapping gene (*patA*), but  
294 deletion of *patA* did not cause a loss of epimutation [13]. *pyrF* and *pyrG* do not have any  
295 overlapping flanking genes.

296  
297 Rapid loss of silencing was observed in 5-FOA-resistant epimutant strains after  
298 five to ten passages without drug selection pressure. Epimutation – a transient and  
299 reversible phenomenon – may provide multiple advantages over genetic mutations that  
300 stably alter DNA sequence. In *Mucor*, which is aseptate and multinucleate, RNA-based  
301 silencing may induce more rapid and complete loss of function of disadvantageous genes  
302 compared to a recessive nuclear mutation, which would be required to sweep the  
303 population to become homokaryotic. In addition, the reversible nature of epimutation  
304 allows for subsequent reversal of adaptations that may be disadvantageous after a  
305 selective pressure is no longer present. For example, the uracil auxotrophy induced  
306 secondary to 5-FOA resistance could affect growth in low uracil conditions; under such  
307 conditions, epimutants, which can rapidly revert to wild-type and resume uracil synthesis,  
308 would have an advantage over *pyrF* or *pyrG* mutants. In support of this hypothesis we  
309 observed that *pyrF* and *pyrG* epimutants grew more effectively than a *pyrG* mutant strain  
310 in MMC lacking uracil supplementation, indicating that the epimutants may have  
311 incompletely silenced the *pyrF* or *pyrG* gene or may be undergoing reversion in response  
312 to selective pressure (Fig. 1). This is further supported by our qPCR data that  
313 demonstrated reduced, but not abolished, levels of *pyrF* or *pyrG* expression in the  
314 respective epimutants (Fig. 4).

315           The phenomenon of epimutation could thus be comparable to other described  
316 instances of fungal epigenetic heterogeneity, serving as a bet-hedging strategy that  
317 enables rapid and reversible responses to a variety of environmental conditions. One  
318 previously described example is telomeric silencing: genetic markers located near the  
319 telomeres of *S. cerevisiae*, including *URA3* as well as *ADE2*, were demonstrated to be  
320 variably silenced in a given population of yeast [38, 39]. These mixed populations  
321 (*URA<sup>+</sup>/ura<sup>-</sup>* or *ADE<sup>+</sup>/ade<sup>-</sup>*) are attributable to telomeric heterochromatin expanding and  
322 contracting across the integrated gene, resulting in silencing or expression. Likewise, in  
323 the fungal pathogen *C. neoformans*, the phenomena of sex-induced silencing or mitotic-  
324 induced silencing can be observed after tandem insertions of transgenes such as *ADE2*.  
325 The variable silencing of this tandem array can be observed through the phenomenon of  
326 variegation of colonies with both *ADE* and *ade<sup>-</sup>* phenotypes [19, 21, 40].

327  
328           *Mucor* is known to possess multiple functional RNAi pathways [9, 41]. The sRNAs  
329 generated from the *pyrF* and *pyrG* loci show hallmark properties of RNAs that induce  
330 silencing through the core RNAi pathway [41]. Furthermore, sRNAs from *pyrG* localized  
331 to the exons of these genes, suggesting that the sRNAs were most likely generated and  
332 processed from mature mRNA. The gene *pyrF* contains no introns, but sRNAs were found  
333 to localize across the entire open reading frame without extending into neighboring  
334 regions. This suggests introns are not required for epimutation, and thus epimutation is  
335 distinct from previously described mechanisms of RNAi-mediated degradation that target  
336 poorly spliced introns [42].

337



338           5-FOA-resistant epimutants were discovered in two distinct genetic backgrounds:  
339 the *rdrp1* and *rdrp3* mutants, each of which lacks one of the three RNA-dependent RNA  
340 polymerases with roles in RNAi in *Mucor*. However, unlike the previous report of FK506-  
341 resistant epimutants, no 5-FOA-resistant epimutant strains were identified in wild-type  
342 strains or in an *r3b2* $\Delta$  strain mutated for a different RNAi component (S2 Table). In both  
343 the *rdrp1* and *rdrp3* mutant backgrounds, the overall frequency of 5-FOA-resistant  
344 epimutants was notably lower than the frequency of FK506-resistant epimutants,  
345 potentially due to the auxotrophic effect caused by loss of *pyrF* or *pyrG*. These RNAi  
346 deficient strains were previously demonstrated to have an increased frequency of  
347 epimutation relative to wild-type [13, 14]. Hence, one possibility is that the frequency of  
348 wild-type epimutants resistant to 5-FOA may be even lower than the frequency seen in  
349 RNAi mutant strains, making these wild-type epimutants difficult to isolate. Alternatively,  
350 it is possible that these mutant backgrounds are required for the isolation of 5-FOA-  
351 resistant epimutants. If RNAi deficiency is required for generation of 5-FOA-resistant  
352 epimutants, these findings would illustrate an interesting potential pathway to drug  
353 resistance that combines both a Mendelian (*rdrp1* $\Delta$  or *rdrp3* $\Delta$ ) and an epigenetic factor in  
354 a two-step process.

355  
356           Epimutation may enable an organism to temporarily resist environmental stresses  
357 to provide time for more permanent genetic diversity to arise. For example, induction of  
358 drug tolerance has been shown to play a role in subsequent mutation and the eventual  
359 development of bona fide drug resistance in bacteria [43, 44]. Similarly, aneuploidy has  
360 been reported to serve as a transient evolutionary adaptation that enables other genetic

361 changes to arise [45]. One 5-FOA-resistant strain generated in this study, epimutant E7,  
362 initially expressed sRNA against *pyrF* and had no mutations in *pyrF* or *pyrG*. It lost this  
363 sRNA expression by passage 15, but did not revert to 5-FOA sensitivity even after 70  
364 passages without selection (S4 Fig). Neither *pyrF* nor *pyrG* mutations were identified in  
365 this strain after passaging. One potential explanation based on these results is that  
366 epimutation provided transient relief from drug toxicity for this isolate and thus enabled  
367 the development of a more permanent form of resistance that remains to be elucidated.

368

369 In broader clinical terms, it is interesting to consider the role epimutation may play  
370 in *Mucor's* intrinsic resistance to many antifungal agents, and whether epimutation may  
371 affect development of further resistance. For example, it has been suggested that amino  
372 acid substitutions in the *Mucor* Erg11/CYP51 enzyme, the target of the azole drug class,  
373 may explain part of *Mucor's* innate resistance to certain structural classes of azoles (i.e.  
374 short- vs long-tailed azoles) [46]. However, this distinction alone is not sufficient to explain  
375 why only two azoles possess efficacy against *Mucor*, and additional mechanisms for  
376 intrinsic azole resistance should be investigated. In addition, epimutation could play a role  
377 in development of resistance to effective antifungals. The two front-line antifungals in  
378 clinical use against mucormycosis are the azole isavuconazole and the polyene  
379 amphotericin B. Resistance to azoles and polyenes in other pathogenic fungi, such as  
380 *Candida* species, can be mediated by loss of the ergosterol biosynthetic enzymes Erg3  
381 and Erg6 [47-52]. Using bioinformatic analysis we have identified three candidate *ERG6*  
382 homologs and one candidate *ERG3* homolog in *Mucor* and we hypothesize that  
383 epimutation could induce silencing of these genes under appropriate drug selection,

384 leading to acquired drug resistance. In particular, the presence of multiple copies of the  
385 gene encoding Erg6 could make this enzyme an especially appealing target for  
386 epimutation; if there is sufficient homology between these copies, we hypothesize RNAi  
387 could induce silencing of all three copies at once, instead of requiring mutations at all  
388 three loci to develop resistance.

389  
390 Identification and characterization of 5-FOA resistance via RNAi-based  
391 epimutation advances understanding of the general mechanisms of drug resistance in  
392 *Mucor circinelloides*. The transient nature of epimutation is advantageous as it allows for  
393 rapid, facile reversion and flexible responses to changing conditions, such as uracil  
394 auxotrophy versus drug stress, enabling better adaptation to stressful conditions. Further  
395 questions that remain include whether RNAi-based epimutation occurs in other fungal  
396 species or other organisms with active RNAi systems. Further elucidation of the  
397 mechanism of epimutation advances our understanding of RNAi, drug resistance, and  
398 stress response mechanisms and may offer novel approaches to combat antifungal drug  
399 resistance.

## 400 **Materials and Methods**

401

### 402 **Strains and growth conditions**

403 All epimutants in this study were generated from strains of *Mucor circinelloides*  
404 forma *lusitanicus*. *M. circinelloides* f. *lusitanicus* RNAi mutant strains MU439, MU440, and  
405 MU500 (independently derived strains with the genotype *leuA- pyrG- rdrp3Δ::pyrG*) and  
406 MU419 (*leuA- pyrG- rdrp1Δ::pyrG*) were previously generated from the uracil and leucine  
407 auxotrophic strain MU402, which was in turn derived from the wild-type strain CBS277.49  
408 [13, 14, 26]. As these four RNAi mutant strains were generated by using a functional copy  
409 of the *pyrG* gene to interrupt the target RNAi gene, each strain contains a mutant,  
410 nonfunctional copy of *pyrG* at the original locus as well as a functional copy inserted in  
411 an RNAi component gene. MU439, MU419, and the wild-type strain R7B served as  
412 controls for *M. circinelloides* f. *lusitanicus* studies, as appropriate. The strain 1006PhL  
413 was used for all *M. circinelloides* f. *circinelloides* studies.

414 Strains were grown at room temperature (approximately 24°C) with light exposure.  
415 Strains were cultured on MMC media at pH=4.5 (10 g/L casamino acids, 20 g/L glucose,  
416 and 0.5 g/L yeast nitrogen base without amino acids or ammonium sulfate) [26]. Media  
417 was supplemented with both uridine (0.061 g/L) and uracil (0.056 g/L) for potentially  
418 auxotrophic strains. 5-FOA selection was performed on MMC plates supplemented with  
419 uracil/uridine and 2.5 mg/mL 5-FOA. Passages were performed in liquid YPD (10 g/L  
420 yeast extract, 20 g/L peptone, 20 g/L dextrose) and on YPD agar.

421

## 422 **Generation and phenotypic analysis of 5-FOA-resistant mutants and epimutants**

423 Epimutant candidates were generated by spotting *Mucor* spores on MMC media  
424 supplemented with 5-FOA and uridine/uracil; plates were incubated for approximately two  
425 weeks or until patches of resistant hyphal growth emerged from the periphery of drug-  
426 sensitive colonies, which were identified as colonies with severely stunted hyphae.  
427 Resistant isolates were passaged for at least two rounds of vegetative growth and  
428 sporulation under 5-FOA selection prior to sRNA analysis, to ensure a high proportion of  
429 drug resistance in the mycelia.

430 Epimutant strains were passaged in liquid YPD media without drug selection to  
431 induce reversion. For the first passage, spores were added to 3 mL of media and grown  
432 overnight at 30°C with shaking at 250 rpm. Subsequent passages were performed using  
433 a sterile wooden stick to break off a small portion of mycelia for transfer to fresh media.  
434 The final passage was performed using a sterile wooden stick to break off a small portion  
435 of mycelia that was placed on a YPD plate without drug selection; the plate was then  
436 incubated at room temperature (~24°C) with light to allow for growth and sporulation.  
437 Spores were collected in sterile water for subsequent analyses.

438

## 439 **Nucleic acid extractions**

440 Isolates were grown on MMC media, pH=4.5, supplemented with 2.5 mg/mL of 5-  
441 FOA and uridine/uracil as needed. DNA was extracted from hyphae using the MasterPure  
442 Yeast DNA Purification Kit (Epicenter Biotechnologies, Madison, WI), with the preliminary  
443 step of adding ~100  $\mu$ L of 425-600  $\mu$ m glass beads and vortexing for one minute to break

444 up hyphae. *pyrF* and *pyrG* were sequenced in all resistant isolates to rule out genetic  
445 mutations; primers are listed in S1 Table.

446 Isolates for RNA extraction were grown on plates overlaid with sterile cellulose film  
447 (ultraviolet irradiated for 10 minutes per side) to allow for easier removal of hyphae without  
448 agar contamination. Small and total RNAs were extracted using the mirVana kit (Ambion,  
449 Foster City, CA) for hybridization and qPCR analysis.

450

#### 451 **sRNA hybridization**

452 For sRNA hybridization, sRNA for each sample (3.5  $\mu\text{g}$ ) was separated by  
453 electrophoresis on 15% TRIS-urea gels, transferred to Hybond N+ filters, and cross-  
454 linked by ultraviolet irradiation as previously described (2 pulses at  $1.2 \times 10^5 \mu\text{J}$  per  $\text{cm}^2$ )  
455 [13]. Prehybridization was carried out using UltraHyb buffer (Ambion) at  $65^\circ\text{C}$ . *pyrF* and  
456 *pyrG* antisense-specific and 5s rRNA probes were prepared by *in vitro* transcription using  
457 the Maxiscript kit (Ambion); primers are listed in S1 Table. After synthesis, riboprobes  
458 were treated by alkaline hydrolysis as previously described [23], to generate an average  
459 final probe size of  $\sim 50$  nucleotides.

460

#### 461 **mRNA quantification**

462 Quantification of *pyrF* and *pyrG* mRNAs was performed by quantitative real-time  
463 PCR. Single-stranded cDNA was synthesized using AffinityScript (Stratagene, La Jolla,  
464 CA) from RNA samples treated with Turbo DNase (Ambion). cDNA synthesized without  
465 the RT/RNase enzyme mixture was used as a “no-RT control” to control for contamination  
466 by residual genomic DNA. Expression of target genes was measured using Brilliant III

467 ultra-fast SYBR green QPCR mix (Stratagene) using an Applied Biosystems 7500 Real-  
468 time PCR system. Technical triplicates were performed for all samples in each run, and  
469 three biological replicates were performed for each experiment. Gene expression levels  
470 were normalized using actin as the reference gene via the comparative  $\Delta\Delta\text{Ct}$  method.  
471 Primers are listed in S1 Table.

472

### 473 **Statistics**

474 One-way ANOVAs were used to determine the significance of qPCR replicates,  
475 with Tukey's Multiple Comparison Test as a post-hoc test where appropriate. All statistical  
476 analysis was performed using GraphPad Prism.

477

### 478 **High-throughput sRNA sequencing and mapping**

479 sRNA libraries were prepared and sequenced at the Duke Center for Genomic and  
480 Computational Biology using the Illumina TruSeq Small RNA Library Prep Kit coupled  
481 with agarose gel size selection for the miRNA library. Reads have been deposited at GEO  
482 under project accession number GSE113706.

483 Reads were trimmed using Trim Galore! with default settings to remove adapters  
484 [53]. Trimmed reads were then mapped to the *Mucor circinelloides* genome from the JGI  
485 using Bowtie [54, 55]. Reads mapping to gene loci were counted using Cufflinks and  
486 guided by genome annotation from the Joint Genome Institute (JGI) genome assembly  
487 [56].

488 **Acknowledgements**

489  
490           We thank Anna Floyd-Averette and Shelly Clancey for technical support, and  
491 Andrew Alspaugh, Silvia Calo, Shelly Clancey, Victoriano Garre, María Isabel Navarro-  
492 Mendoza, Francisco E. Nicolás, Carlos Pérez-Arques, Shelby Priest, Cecelia Wall,  
493 Santiago Torres Martinez, and Rosa Maria Ruiz Vazquez for critical reading of the  
494 manuscript.



## 495 References

496

- 497 1. Roden MM, Zaoutis TE, Buchanan WL, Knudsen TA, Sarkisova TA, Schaufele RL, et al.  
498 Epidemiology and outcome of zygomycosis: a review of 929 reported cases. *Clin Infect Dis.*  
499 2005;41(5):634-53. Epub 2005/08/05. doi: 10.1086/432579. PubMed PMID: 16080086.
- 500 2. Kontoyiannis DP, Marr KA, Park BJ, Alexander BD, Anaissie EJ, Walsh TJ, et al.  
501 Prospective surveillance for invasive fungal infections in hematopoietic stem cell transplant  
502 recipients, 2001-2006: overview of the Transplant-Associated Infection Surveillance Network  
503 (TRANSNET) Database. *Clin Infect Dis.* 2010;50(8):1091-100. Epub 2010/03/12. doi:  
504 10.1086/651263. PubMed PMID: 20218877.
- 505 3. Petrikkos G, Skiada A, Lortholary O, Roilides E, Walsh TJ, Kontoyiannis DP.  
506 Epidemiology and clinical manifestations of mucormycosis. *Clin Infect Dis.* 2012;54 Suppl  
507 1:S23-34. Epub 2012/01/25. doi: 10.1093/cid/cir866. PubMed PMID: 22247442.
- 508 4. Spellberg B, Walsh TJ, Kontoyiannis DP, Edwards J, Jr., Ibrahim AS. Recent advances in  
509 the management of mucormycosis: from bench to bedside. *Clin Infect Dis.* 2009;48(12):1743-51.  
510 Epub 2009/05/14. doi: 10.1086/599105. PubMed PMID: 19435437; PubMed Central PMCID:  
511 PMCPMC2809216.
- 512 5. Marty FM, Ostrosky-Zeichner L, Cornely OA, Mullane KM, Perfect JR, Thompson GR,  
513 3rd, et al. Isavuconazole treatment for mucormycosis: a single-arm open-label trial and case-  
514 control analysis. *Lancet Infect Dis.* 2016;16(7):828-37. Epub 2016/03/13. doi: 10.1016/S1473-  
515 3099(16)00071-2. PubMed PMID: 26969258.
- 516 6. Kontoyiannis DP, Lewis RE. How I treat mucormycosis. *Blood.* 2011;118(5):1216-24.  
517 Epub 2011/05/31. doi: 10.1182/blood-2011-03-316430. PubMed PMID: 21622653; PubMed  
518 Central PMCID: PMCPMC3292433.
- 519 7. Singh N, Aguado JM, Bonatti H, Forrest G, Gupta KL, Safdar N, et al. Zygomycosis in  
520 solid organ transplant recipients: a prospective, matched case-control study to assess risks for  
521 disease and outcome. *J Infect Dis.* 2009;200(6):1002-11. Epub 2009/08/08. doi: 10.1086/605445.  
522 PubMed PMID: 19659439.
- 523 8. Trieu TA, Navarro-Mendoza MI, Perez-Arques C, Sanchis M, Capilla J, Navarro-  
524 Rodriguez P, et al. RNAi-based functional genomics identifies new virulence determinants in  
525 mucormycosis. *PLoS Pathog.* 2017;13(1):e1006150. Epub 2017/01/21. doi:  
526 10.1371/journal.ppat.1006150. PubMed PMID: 28107502; PubMed Central PMCID:  
527 PMCPMC5287474.
- 528 9. Trieu TA, Calo S, Nicolas FE, Vila A, Moxon S, Dalmay T, et al. A non-canonical RNA  
529 silencing pathway promotes mRNA degradation in basal fungi. *PLoS Genet.*  
530 2015;11(4):e1005168. Epub 2015/04/16. doi: 10.1371/journal.pgen.1005168. PubMed PMID:  
531 25875805; PubMed Central PMCID: PMCPMC4395119.
- 532 10. Li CH, Cervantes M, Springer DJ, Boekhout T, Ruiz-Vazquez RM, Torres-Martinez SR,  
533 et al. Sporangiospore size dimorphism is linked to virulence of *Mucor circinelloides*. *PLoS*  
534 *Pathog.* 2011;7(6):e1002086. Epub 2011/06/24. doi: 10.1371/journal.ppat.1002086. PubMed  
535 PMID: 21698218; PubMed Central PMCID: PMCPMC3116813.
- 536 11. Silva F, Torres-Martinez S, Garre V. Distinct white collar-1 genes control specific light  
537 responses in *Mucor circinelloides*. *Mol Microbiol.* 2006;61(4):1023-37. Epub 2006/08/02. doi:  
538 10.1111/j.1365-2958.2006.05291.x. PubMed PMID: 16879651.

- 539 12. Garcia A, Adedoyin G, Heitman J, Lee SC. Construction of a recyclable genetic marker  
540 and serial gene deletions in the human pathogenic Mucorales *Mucor circinelloides*. *G3: Genes,*  
541 *Genomes, Genetics*. 2017. doi: 10.1534/g3.117.041095.
- 542 13. Calo S, Shertz-Wall C, Lee SC, Bastidas RJ, Nicolas FE, Granek JA, et al. Antifungal  
543 drug resistance evoked via RNAi-dependent epimutations. *Nature*. 2014;513(7519):555-8. Epub  
544 2014/08/01. doi: 10.1038/nature13575. PubMed PMID: 25079329; PubMed Central PMCID:  
545 PMCPMC4177005.
- 546 14. Calo S, Nicolas FE, Lee SC, Vila A, Cervantes M, Torres-Martinez S, et al. A non-  
547 canonical RNA degradation pathway suppresses RNAi-dependent epimutations in the human  
548 fungal pathogen *Mucor circinelloides*. *PLoS Genet*. 2017;13(3):e1006686. Epub 2017/03/25.  
549 doi: 10.1371/journal.pgen.1006686. PubMed PMID: 28339467; PubMed Central PMCID:  
550 PMCPMC5384783.
- 551 15. Cogoni C, Irelan JT, Schumacher M, Schmidhauser TJ, Selker EU, Macino G. Transgene  
552 silencing of the *al-1* gene in vegetative cells of *Neurospora* is mediated by a cytoplasmic effector  
553 and does not depend on DNA-DNA interactions or DNA methylation. *EMBO J*.  
554 1996;15(12):3153-63. PubMed PMID: WOS:A1996UV92000026.
- 555 16. Fire A, Xu S, Montgomery MK, Kostas SA, Driver SE, Mello CC. Potent and specific  
556 genetic interference by double-stranded RNA in *Caenorhabditis elegans*. *Nature*.  
557 1998;391(6669):806-11. Epub 1998/03/05. doi: 10.1038/35888. PubMed PMID: 9486653.
- 558 17. Billmyre RB, Calo S, Feretzaki M, Wang X, Heitman J. RNAi function, diversity, and  
559 loss in the fungal kingdom. *Chromosome Res*. 2013;21(6-7):561-72. Epub 2013/11/01. doi:  
560 10.1007/s10577-013-9388-2. PubMed PMID: 24173579; PubMed Central PMCID:  
561 PMCPMC3874831.
- 562 18. Shiu PK, Raju NB, Zickler D, Metzner RL. Meiotic silencing by unpaired DNA. *Cell*.  
563 2001;107(7):905-16. Epub 2002/01/10. PubMed PMID: 11779466.
- 564 19. Wang X, Darwiche S, Heitman J. Sex-induced silencing operates during opposite-sex and  
565 unisexual reproduction in *Cryptococcus neoformans*. *Genetics*. 2013;193(4):1163-74. Epub  
566 2013/02/05. doi: 10.1534/genetics.113.149443. PubMed PMID: 23378067; PubMed Central  
567 PMCID: PMCPMC3606094.
- 568 20. Volpe TA, Kidner C, Hall IM, Teng G, Grewal SI, Martienssen RA. Regulation of  
569 heterochromatic silencing and histone H3 lysine-9 methylation by RNAi. *Science*.  
570 2002;297(5588):1833-7. Epub 2002/08/24. doi: 10.1126/science.1074973. PubMed PMID:  
571 12193640.
- 572 21. Wang X, Hsueh Y-PP, Li W, Floyd A, Skalsky R, Heitman J. Sex-induced silencing  
573 defends the genome of *Cryptococcus neoformans* via RNAi. *Genes & Development*.  
574 2010;24(22):2566-82. doi: 10.1101/gad.1970910.
- 575 22. Ard R, Tong P, Allshire RC. Long non-coding RNA-mediated transcriptional  
576 interference of a permease gene confers drug tolerance in fission yeast. *Nat Commun*.  
577 2014;5:5576. Epub 2014/11/28. doi: 10.1038/ncomms6576. PubMed PMID: 25428589; PubMed  
578 Central PMCID: PMCPMC4255232.
- 579 23. Nicolas FE, Torres-Martinez S, Ruiz-Vazquez RM. Two classes of small antisense RNAs  
580 in fungal RNA silencing triggered by non-integrative transgenes. *EMBO J*. 2003;22(15):3983-  
581 91. Epub 2003/07/26. doi: 10.1093/emboj/cdg384. PubMed PMID: 12881432; PubMed Central  
582 PMCID: PMCPMC169057.

- 583 24. Gheinani AH, Jahromi NH, Feuk-Lagerstedt E, Taherzadeh MJ. RNA silencing of lactate  
584 dehydrogenase gene in *Rhizopus oryzae*. J RNAi Gene Silencing. 2011;7:443-8. Epub  
585 2011/07/20. PubMed PMID: 21769297; PubMed Central PMCID: PMCPMC3131675.
- 586 25. Boeke JD, LaCroute F, Fink GR. A positive selection for mutants lacking orotidine-5'-  
587 phosphate decarboxylase activity in yeast: 5-fluoro-orotic acid resistance. Mol Gen Genet.  
588 1984;197(2):345-6. Epub 1984/01/01. doi: 10.1007/bf00330984. PubMed PMID: 6394957.
- 589 26. Nicolás FE, Haro JP, Torres-Martínez S, Ruiz-Vázquez RM. Mutants defective in a  
590 *Mucor circinelloides dicer*-like gene are not compromised in siRNA silencing but display  
591 developmental defects. Fungal Genet Biol. 2007;44(6):504-16.
- 592 27. Lee S, Li A, Calo S, Heitman J. Calcineurin Plays Key Roles in the Dimorphic Transition  
593 and Virulence of the Human Pathogenic Zygomycete *Mucor circinelloides*. PLoS Pathogens.  
594 2013;9(9). doi: 10.1371/journal.ppat.1003625.
- 595 28. Velayos A, Alvarez MI, Eslava AP, Iturriaga EA. Interallelic complementation at the  
596 *pyrF* locus and the homodimeric nature of orotate phosphoribosyltransferase (OPRTase) in  
597 *Mucor circinelloides*. Mol Gen Genet. 1998;260(2-3):251-60. doi: DOI 10.1007/s004380050893.  
598 PubMed PMID: WOS:000077435400015.
- 599 29. Benito EP, Diazminguez JM, Iturriaga EA, Campuzano V, Eslava AP. Cloning and  
600 sequence analysis of the *Mucor circinelloides pyrG* gene encoding orotidine-5'-monophosphate  
601 decarboxylase - use of *pyrG* for homologous transformation. Gene. 1992;116(1):59-67. doi: Doi  
602 10.1016/0378-1119(92)90629-4. PubMed PMID: WOS:A1992JD84000009.
- 603 30. Cubas P, Vincent C, Coen E. An epigenetic mutation responsible for natural variation in  
604 floral symmetry. Nature. 1999;401(6749):157-61. Epub 1999/09/18. doi: 10.1038/43657.  
605 PubMed PMID: 10490023.
- 606 31. Brown R, Curry E, Magnani L, Wilhelm-Benartzi CS, Borley J. Poised epigenetic states  
607 and acquired drug resistance in cancer. Nat Rev Cancer. 2014;14(11):747-53. Epub 2014/09/26.  
608 doi: 10.1038/nrc3819. PubMed PMID: 25253389.
- 609 32. Gazzoli I, Loda M, Garber J, Syngal S, Kolodner RD. A hereditary nonpolyposis  
610 colorectal carcinoma case associated with hypermethylation of the *MLH1* gene in normal tissue  
611 and loss of heterozygosity of the unmethylated allele in the resulting microsatellite instability-  
612 high tumor. Cancer Res. 2002;62(14):3925-8.
- 613 33. Esteller M, Silva J, Dominguez G, Bonilla F, Matias-Guiu X, Lerma E, et al. Promoter  
614 hypermethylation and BRCA1 inactivation in sporadic breast and ovarian tumors. JNCI: Journal  
615 of the National Cancer Institute. 2000;92(7):564-9. doi: 10.1093/jnci/92.7.564.
- 616 34. Snell C, Krypuy M, Wong E, investigators k, Loughrey MB, Dobrovic A. BRCA1  
617 promoter methylation in peripheral blood DNA of mutation negative familial breast cancer  
618 patients with a BRCA1 tumour phenotype. Breast Cancer Res. 2008;10(1). doi:  
619 10.1186/bcr1858.
- 620 35. Suter CM, Martin DIK, Ward RL. Germline epimutation of MLH1 in individuals with  
621 multiple cancers. Nature Genetics. 2004;36(5):497-501. doi: 10.1038/ng1342.
- 622 36. Pan J-J, Xie X-J, Li X, Chen W. Long non-coding RNAs and drug resistance. Asian Pac J  
623 Cancer Prev. 2016;16(18):8067-73. doi: 10.7314/apjcp.2015.16.18.8067.
- 624 37. Easwaran H, Tsai HC, Baylin SB. Cancer epigenetics: tumor heterogeneity, plasticity of  
625 stem-like states, and drug resistance. Mol Cell. 2014;54(5):716-27. Epub 2014/06/07. doi:  
626 10.1016/j.molcel.2014.05.015. PubMed PMID: 24905005; PubMed Central PMCID:  
627 PMCPMC4103691.

- 628 38. Gottschling DE, Aparicio OM, Billington BL, Zakian VA. Position effect at *S. cerevisiae*  
629 telomeres: Reversible repression of Pol II transcription. *Cell*. 1990. doi: 10.1016/0092-  
630 8674(90)90141-z.
- 631 39. Aparicio OM, Billington BL, Gottschling DE. Modifiers of position effect are shared  
632 between telomeric and silent mating-type loci in *S. cerevisiae*. *Cell*. 1991;66(6):1279-87. doi:  
633 10.1016/0092-8674(91)90049-5.
- 634 40. Wang X, Wang P, Sun S, Darwiche S, Idnurm A, Heitman J. Transgene induced co-  
635 suppression during vegetative growth in *Cryptococcus neoformans*. *PLoS genetics*. 2012;8(8).  
636 doi: 10.1371/journal.pgen.1002885.
- 637 41. Nicolas FE, Moxon S, de Haro JP, Calo S, Grigoriev IV, Torres-Martínez S, et al.  
638 Endogenous short RNAs generated by Dicer 2 and RNA-dependent RNA polymerase 1 regulate  
639 mRNAs in the basal fungus *Mucor circinelloides*. *Nucleic Acids Research*. 2010;38(16):5535-  
640 41. doi: 10.1093/nar/gkq301.
- 641 42. Dumesic PA, Natarajan P, Chen C, Drinnenberg IA, Schiller BJ, Thompson J, et al.  
642 Stalled spliceosomes are a signal for RNAi-mediated genome defense. *Cell*. 2013;152(5):957-68.  
643 doi: 10.1016/j.cell.2013.01.046.
- 644 43. Billmyre RB, Heitman J. Genetic and epigenetic engines of diversity in pathogenic  
645 microbes. *PLoS Pathog*. 2017;13(9):e1006468. Epub 2017/09/15. doi:  
646 10.1371/journal.ppat.1006468. PubMed PMID: 28910393; PubMed Central PMCID:  
647 PMC5599048.
- 648 44. Levin-Reisman I, Ronin I, Gefen O, Braniss I, Shores N, Balaban NQ. Antibiotic  
649 tolerance facilitates the evolution of resistance. *Science*. 2017;355(6327):826-30. Epub  
650 2017/02/12. doi: 10.1126/science.aaj2191. PubMed PMID: 28183996.
- 651 45. Yona AH, Manor YS, Herbst RH, Romano GH, Mitchell A, Kupiec M, et al.  
652 Chromosomal duplication is a transient evolutionary solution to stress. *Proc Natl Acad Sci*.  
653 2012;109(51):21010-5. doi: 10.1073/pnas.1211150109.
- 654 46. Caramalho R, Tyndall JDA, Monk BC, Larentis T, Lass-Flörl C, Lackner M. Intrinsic  
655 short-tailed azole resistance in mucormycetes is due to an evolutionary conserved aminoacid  
656 substitution of the lanosterol 14 $\alpha$ -demethylase. *Sci Rep*. 2017;7(1):15898. doi: 10.1038/s41598-  
657 017-16123-9.
- 658 47. Young LY, Hull CM, Heitman J. Disruption of ergosterol biosynthesis confers resistance  
659 to amphotericin B in *Candida lusitanae*. *Antimicrobial agents and chemotherapy*.  
660 2003;47(9):2717-24.
- 661 48. Luna-Tapia A, Willems HME, Parker JE, Tournu H, Barker KS, Nishimoto AT, et al.  
662 Loss of Upc2p-inducible ERG3 transcription is sufficient to confer niche-specific azole  
663 resistance without compromising *Candida albicans* pathogenicity. *mBio*. 2018;9(3):18. doi:  
664 10.1128/mbio.00225-18.
- 665 49. Kelly SL, Lamb DC, Kelly DE, Manning NJ, Loeffler J, Hebart H, et al. Resistance to  
666 fluconazole and cross-resistance to amphotericin B in *Candida albicans* from AIDS patients  
667 caused by defective sterol delta5,6-desaturation. *FEBS letters*. 1997;400(1):80-2.
- 668 50. Kelly SL, Lamb DC, Kelly DE, Loeffler J, Einsele H. Resistance to fluconazole and  
669 amphotericin in *Candida albicans* from AIDS patients. *Lancet (London, England)*.  
670 1996;348(9040):1523-4. doi: 10.1016/S0140-6736(05)65949-1.
- 671 51. Nolte FS, Parkinson T, Falconer DJ, Dix S, Williams J, Gilmore C, et al. Isolation and  
672 characterization of fluconazole- and amphotericin B-resistant *Candida albicans* from blood of  
673 two patients with leukemia. *Antimicrobial agents and chemotherapy*. 1997;41(1):196-9.

- 674 52. Robbins N, Collins C, Morhayim J, Cowen LE. Metabolic control of antifungal drug  
675 resistance. *Fungal genetics and biology : FG & B.* 2010;47(2):81-93. doi:  
676 10.1016/j.fgb.2009.07.004.
- 677 53. Kruger F. Trim Galore. A wrapper tool around Cutadapt FastQC to consistently apply  
678 Qual Adapt trimming to FastQ files. 2015.
- 679 54. Corrochano LM, Kuo A, Marcet-Houben M, Polaino S, Salamov A, Villalobos-Escobedo  
680 JM, et al. Expansion of signal transduction pathways in fungi by extensive genome duplication.  
681 *Curr Biol.* 2016;26(12):1577-84. Epub 2016/05/31. doi: 10.1016/j.cub.2016.04.038. PubMed  
682 PMID: 27238284; PubMed Central PMCID: PMC5089372.
- 683 55. Langmead B, Salzberg SL. Fast gapped-read alignment with Bowtie 2. *Nat Methods.*  
684 2012;9(4):357-9. Epub 2012/03/06. doi: 10.1038/nmeth.1923. PubMed PMID: 22388286;  
685 PubMed Central PMCID: PMC3322381.
- 686 56. Trapnell C, Roberts A, Goff L, Pertea G, Kim D, Kelley DR, et al. Differential gene and  
687 transcript expression analysis of RNA-seq experiments with TopHat and Cufflinks. *Nat Protoc.*  
688 2012;7(3):562-78. Epub 2012/03/03. doi: 10.1038/nprot.2012.016. PubMed PMID: 22383036;  
689 PubMed Central PMCID: PMC3334321.

690



691 **Figure captions**

692

693 **Fig 1. sRNA hybridization and phenotypic analysis of 5-FOA-resistant epimutants.**

694 **(A)** sRNA hybridization of epimutants and revertants from an *rdrp3* mutant background,  
695 before (R – resistant) and after 5 (P5) or 10 (P10) passages without selection. P, *rdrp3* $\Delta$   
696 parental strain (MU439). Blots were hybridized with antisense-specific probes against  
697 *pyrF*, *pyrG*, or 5S rRNA (loading control). **(B)** sRNA blot of epimutants and revertants from  
698 an *rdrp1* mutant background, before (R – resistant) and after 5 passages without selection  
699 (P5). P, *rdrp1* $\Delta$  parental strain (MU419). Blots were hybridized with antisense-specific  
700 probes against *pyrF*, *pyrG* or 5S rRNA (loading control). **(C)** Phenotypic analysis of one  
701 representative epimutant, before and after reversion. A *pyrF* epimutant (E2) is shown  
702 before and after 5 (P5) and 10 (P10) passages without selection, grown on MMC media,  
703 MMC supplemented with uridine and uracil, and MMC supplemented with 5-FOA, uridine,  
704 and uracil. *pyrG*<sup>-</sup>, a known mutant of *pyrG*, served as a negative control; P, *rdrp3* $\Delta$   
705 parental strain (MU439). **(D)** A *pyrG* epimutant (E4) is shown before and after 5 (P5)  
706 passages without selection, grown on MMC, MMC supplemented with uracil, and MMC  
707 supplemented with 5-FOA and uracil. P, *rdrp1* $\Delta$  parental strain (MU419).

708

709 **Fig 2. 5-FOA resistance is associated with increased levels of sRNAs against either**  
710 **the *pyrF* or *pyrG* locus.**

711 **(A)** Representative diagram of sRNAs mapped across the *pyrF* locus showing  
712 accumulation of both sense (- values) and antisense sRNA (+ values) in epimutant E1 (in  
713 red). Expression levels are greatly decreased in the revertant after 5 passages without  
714 selection (in blue). No increase in sRNA levels is seen in the surrounding regions. **(B)**

715 Representative diagram of sRNAs mapped across the *pyrG* locus showing accumulation  
716 of both sense (+ values) and antisense sRNA (- values) in epimutant E4 (in red), with  
717 greatly decreased sRNA levels in the revertant after 5 passages without selection (in  
718 blue). No increase of sRNA levels is observed in the surrounding regions.

719

### 720 **Fig 3. Length and terminal nucleotide analysis of sRNAs in epimutants.**

721 Antisense sRNAs from epimutant strains and their corresponding revertants that map  
722 against the *pyrF* and *pyrG* loci. **(A)** Analysis of the 5' nucleotide of antisense sRNAs that  
723 map to the *pyrF* locus, isolated from the *pyrF* epimutant strain E1 and revertant. **(B)**  
724 Analysis of the 5' nucleotide of antisense sRNAs that map to the *pyrG* locus, isolated from  
725 the *pyrG* epimutant strain E4 and revertant. **(C)** Analysis of the size of antisense sRNAs  
726 that map to *pyrF* in strain E1 and revertant. **(D)** Analysis of the size of antisense sRNAs  
727 that map to *pyrG* in strain E4 and revertant.

728

### 729 **Fig 4. Epimutation decreases expression of *pyrF* and *pyrG* mRNA.**

730 **(A)** Expression of *pyrF* mRNA in *pyrF* epimutant and revertant strains (Passage 5, P5) as  
731 determined through qRT-PCR, with actin expression used for the reference gene. Gene  
732 expression levels were normalized relative to the *rdp3Δ* parental strain (PS), using actin  
733 as the reference gene via the comparative  $\Delta\Delta C_t$  method. N=3 experimental replicates;  
734 error bars depict standard error of the mean (SEM). Significance determined via one-way  
735 ANOVA (P=0.0005, F=13.37, 4 degrees of freedom) with post-hoc Tukey's Multiple  
736 Comparison test. **(B)** Expression of *pyrG* mRNA in *pyrF* epimutant and revertant strains.  
737 N=1. **(C)** Expression of *pyrF* mRNA in a *pyrG* epimutant and revertant strain as

738 determined through qRT-PCR, with actin expression used for the reference gene. Percent  
739 expression was normalized relative to *rdp1* $\Delta$  parental strain (PS). N = 3 experimental  
740 replicates; error bars depict SEM. Significance determined via one-way ANOVA (P=0.51,  
741 F=0.74, 2 degrees of freedom). **(D)** Expression of *pyrG* mRNA in *pyrG* epimutant and  
742 revertant strain. N = 3 experimental replicates; error bars depict SEM. Significance  
743 determined via one-way ANOVA (P=0.059, F=4.7, 2 degrees of freedom).  
744



745 **Supporting information**

746

747 **S1 Fig. *pyrF* and *pyrG* are differentially enriched for sRNAs in epimutant vs.**  
748 **revertant strains.**

749 Genome-wide sRNA levels are plotted between two sequenced libraries, with values for  
750 one library plotted on the X and the other on the Y. The point representing *pyrF* is depicted  
751 in red and the *pyrG* is depicted in blue. E1 and E2 are *pyrF* epimutant strains; E4 is a  
752 *pyrG* epimutant strain.

753

754 **S2 Fig. Epimutant revertants demonstrate a 5' uracil predominance in antisense**  
755 **sRNAs against *pyrF* and *pyrG*.**

756 Analysis of the 5' nucleotide of antisense sRNAs that map to the *pyrF* and *pyrG* loci. Data  
757 from Fig. 3 is replotted here with an expanded y-axis to enable easier comparison of 5'  
758 terminal nucleotides in sRNA from revertant strains. **(A)** 5' terminal nucleotides of  
759 antisense sRNAs isolated from *pyrF* epimutant E1 and revertant. **(B)** 5' terminal  
760 nucleotides of antisense sRNAs isolated from *pyrG* epimutant E4 and revertant.

761

762 **S3 Fig. A set of genes with discordant sRNA expression in epimutants vs.**  
763 **revertants are evenly distributed across the *Mucor* genome.**

764 **(A)** Genome-wide sRNA levels are shown with the gene set that is expressed more than  
765 15-fold higher in the E2 revertant than in the E2 epimutant shaded in red. That same gene  
766 set is also shaded in the comparison of the *rdp1Δ* parent strain with the WT parent to

767 demonstrate that the same gene set is behaving anomalously in both comparisons. **(B)**  
768 Genes with discordant sRNA expression are shown across the *Mucor* genome (red bars  
769 not to scale relative to scaffold). These genes appear on every scaffold of the genome  
770 that is greater than 41 kb in size.

771

772 **S4 Fig. Epimutant E7 maintains 5-FOA resistance after cessation of sRNA**  
773 **expression.**

774 **(A)** The *pyrF* epimutant E7 maintains a degree of 5-FOA resistance even after 70  
775 passages without drug selection (P70). An independent repeat of passaging  
776 demonstrates continued 5-FOA resistance through 40 passages (P40v2). Strains were  
777 grown on MMC media, MMC supplemented with uridine and uracil, and MMC  
778 supplemented with 5-FOA, uridine, and uracil. P, *rdp1*Δ parental strain (MU419). **(B)**  
779 sRNA hybridization of passaged strains of epimutant E7. Epimutant E7 expresses sRNA  
780 against *pyrF*, but this sRNA is no longer expressed from 15 passages (P15) through 70  
781 passages (P70). Similarly, strains from an independent set of passages demonstrate no  
782 sRNA against *pyrF* at passages 15 (P15v2), 30 (P30v2), or 40 (P40v2). The top portion  
783 of the gel was stained with ethidium bromide (EtBr) to visualize the 5S rRNA loading  
784 control, after which sRNA was transferred to a membrane for hybridization with an  
785 antisense-specific probe against *pyrF*.

786 **S1 Table. Primers used in this study**

787 **S2 Table. Strains generated in this study**

788

# Figure 1

## A

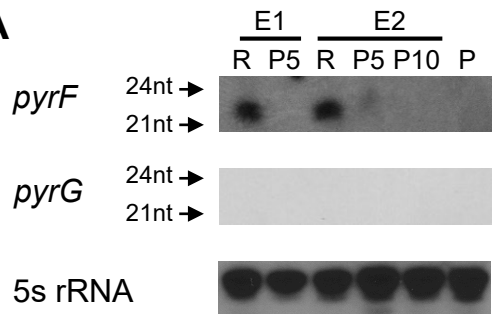

## B

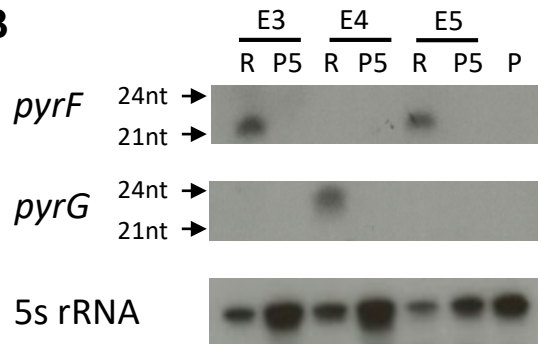

## C

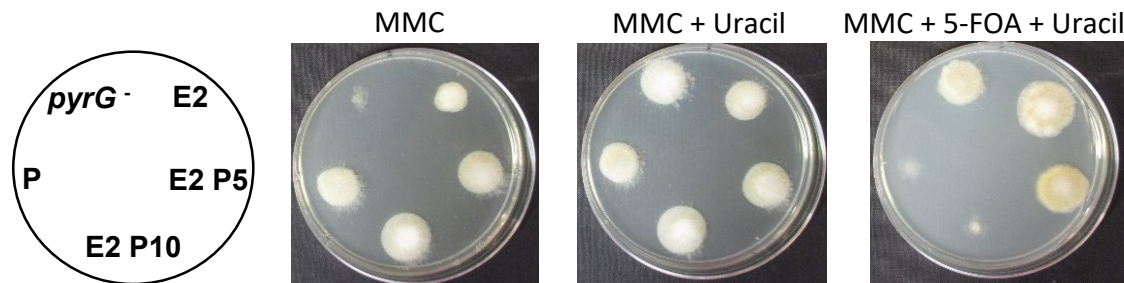

## D

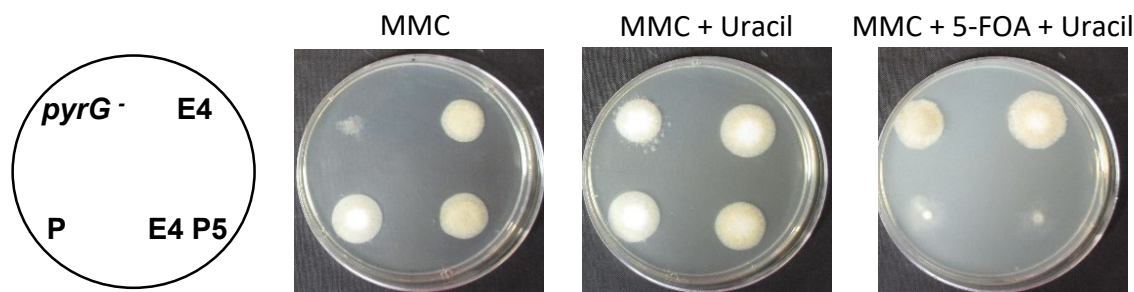

# Figure 2

## A

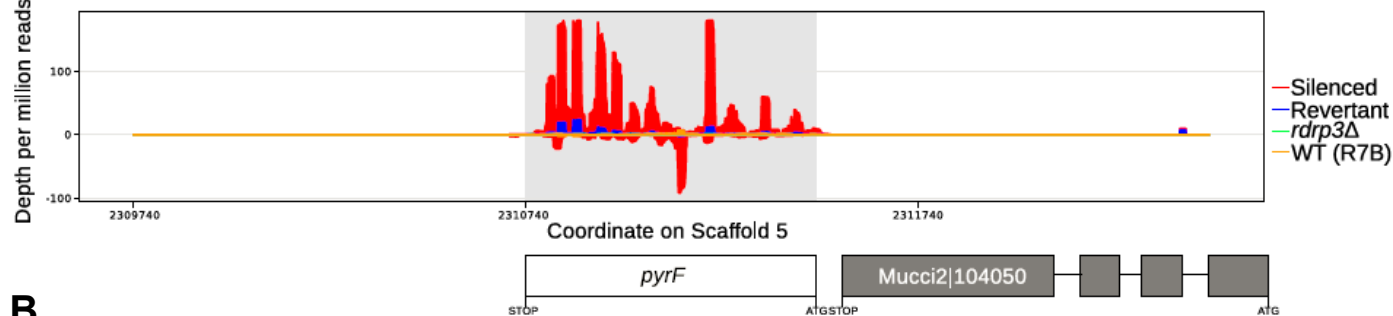

## B

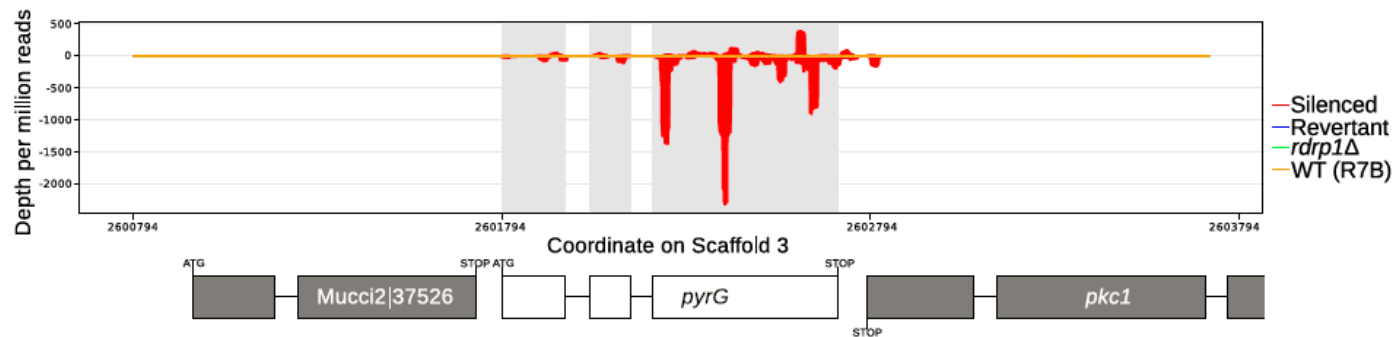

# Figure 3

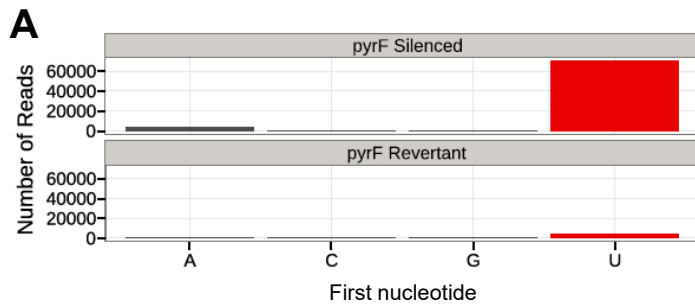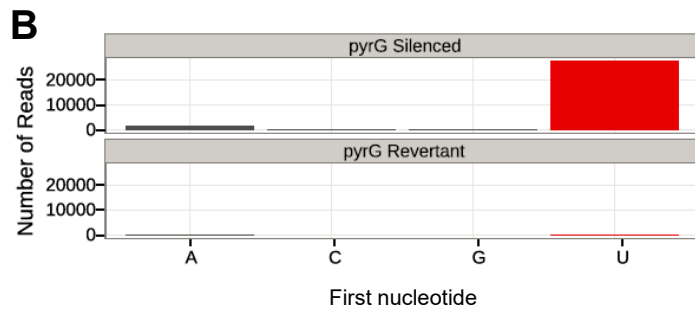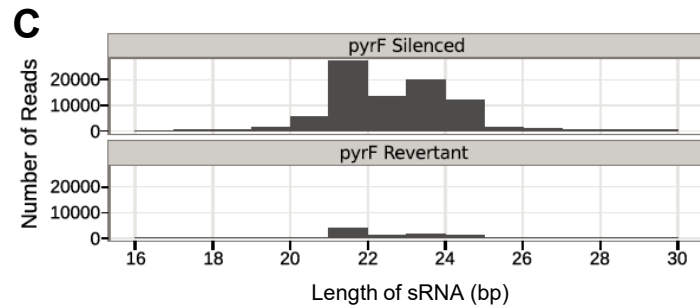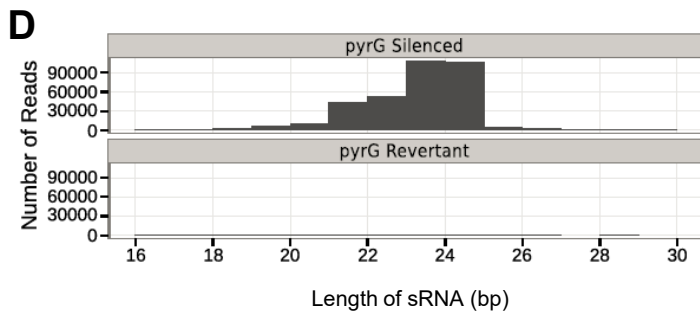

Figure 4

**A**

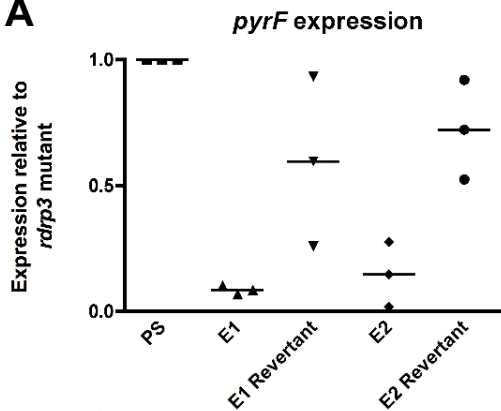

**B**

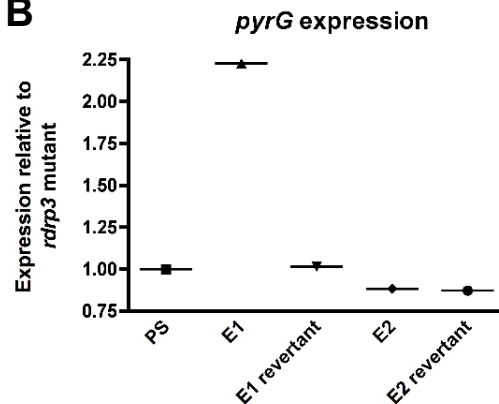

**C**

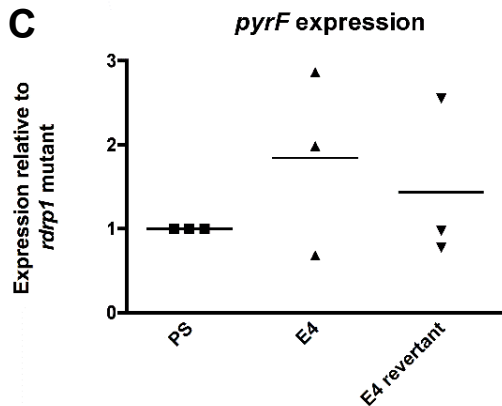

**D**

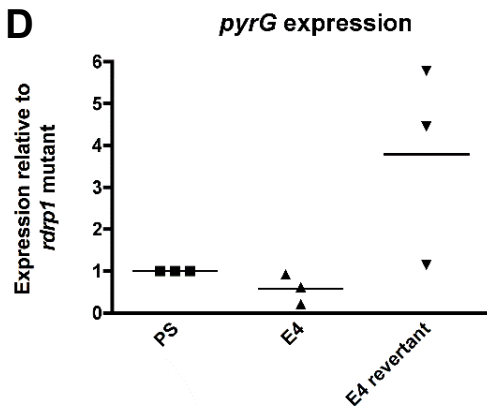

Source: http://biorxiv.org/content/10.1101/526459v1.full.pdf
